# Supplementary material for: DhDIT2 Encodes a Debaryomyces hansenii Cytochrome P450 Involved in Benzo(a)pyrene Degradation—A Proposal for Mycoremediation
Source: MDPI journal article supplement (doi:10.3390/jof8111150), 2022-10-30
Supplement: s1 [file s1]

## Supplementary Figure S1.

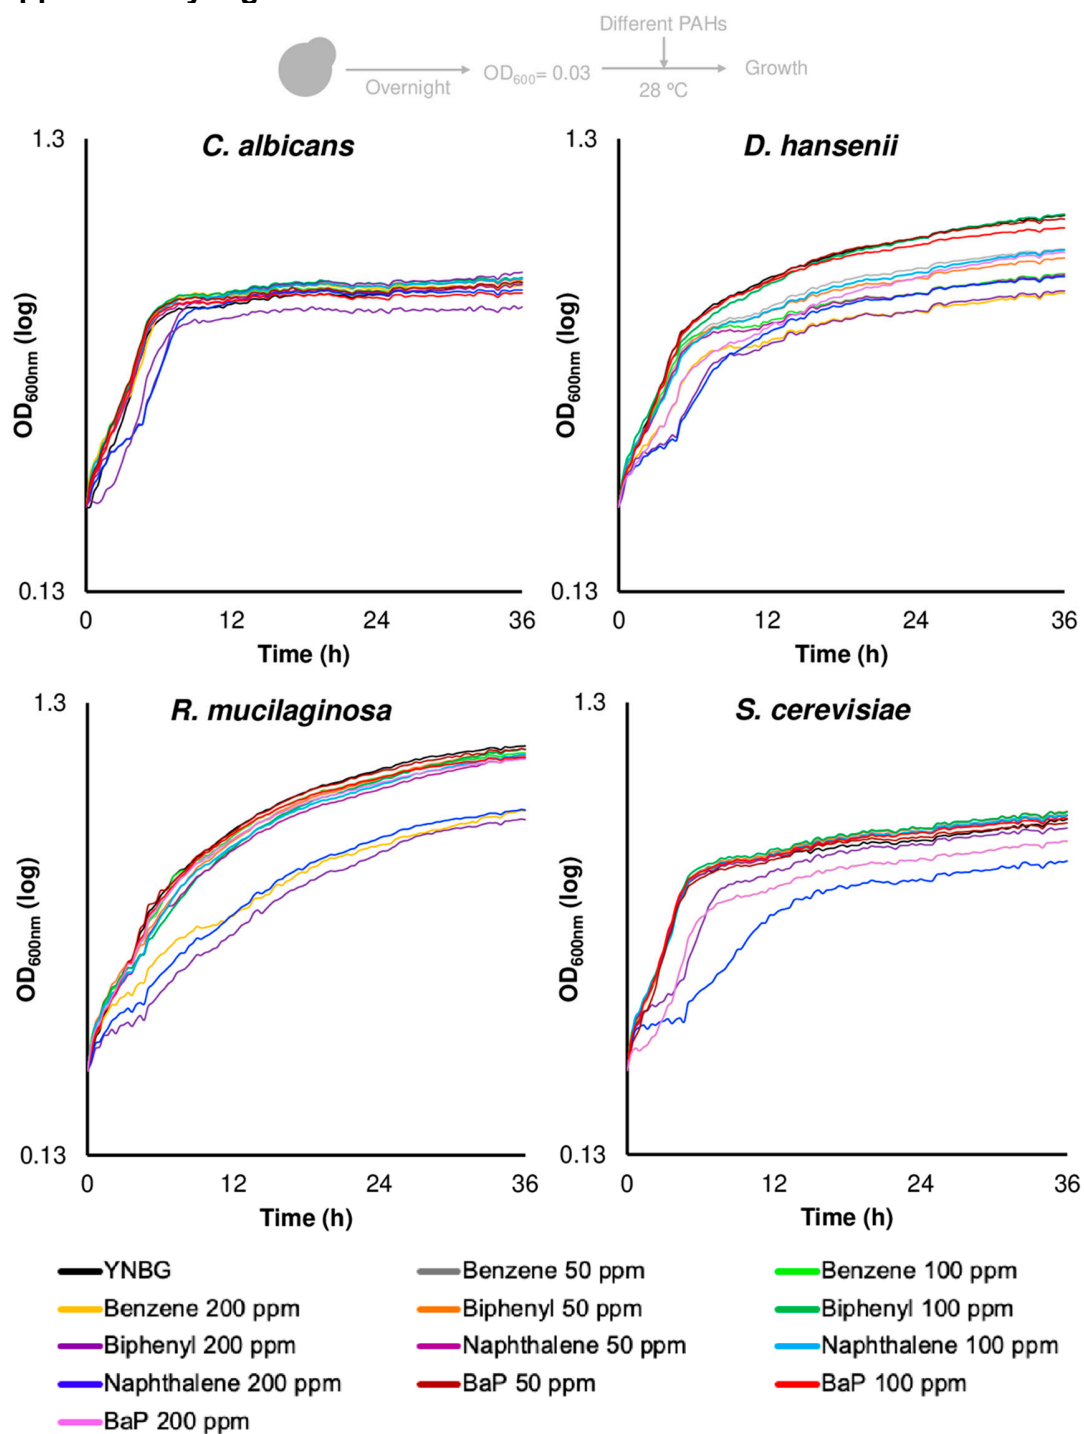

**Figure S1. Effect of different PAHs on yeast growth.** The effect of several concentrations (10 ppm to 500 ppm) of benzene, naphthalene, biphenyl, and BaP was studied on the growth of *C. albicans*, *D. hansenii*, *R. mucilaginosa*, and *S. cerevisiae* at 28 °C. Cell density was measured every hour for 36 h in an automated BioscreenC plate reader. Each curve represents three biological replicates.

**Supplementary Table S1.** Genes encoding the yeast CYPs studied in this work

| Yeast                  | Gene                                     | Gene length (pb) | Exons | Aminoacids | Protein   |
|------------------------|------------------------------------------|------------------|-------|------------|-----------|
| <i>C. albicans</i>     | <i>ALK1</i>                              | 1581             | 1     | 526        | CYP52A24  |
| <i>D. hansenii</i>     | <i>DEHA2C02596g</i><br>( <i>DhDIT2</i> ) | 1575             | 1     | 525        | CYP52A44  |
| <i>S. cerevisiae</i>   | <i>DIT2</i>                              | 1470             | 1     | 490        | CYP56A1   |
| <i>R. mucilaginosa</i> | <i>700567</i>                            | 1815             | 8     | 605        | CYP700567 |
|                        | <i>710473</i>                            | 1596             | 9     | 532        | CYP710473 |
|                        | <i>680755</i>                            | 1626             | 10    | 542        | CYP680755 |

To identify CYP homologues in *Candida albicans*, *Debaryomyces hansenii*, *Rhodotorula mucilaginosa*, and *Saccharomyces cerevisiae*, queries were performed in the following databases: Cytochrome P450 (<https://drnelson.uthsc.edu/Cytochrome450.html>) [29], Fungal cytochrome P450 database (<http://p450.riceblast.snu.ac.kr/index.php?a=view>) [30] ensemble fungi (<https://fungi.ensembl.org/index.html>) [31], and the *Saccharomyces* genome database website (<https://www.yeastgenome.org>) [32]. This research was conducted using the *AY515589* gene coding for the *Phanerochaete chrysosporium* CYP5144A7 protein and the *AN1884* gene coding for the *Aspergillus nidulans* CYP617D1 protein.

## Supplementary Figure S2.

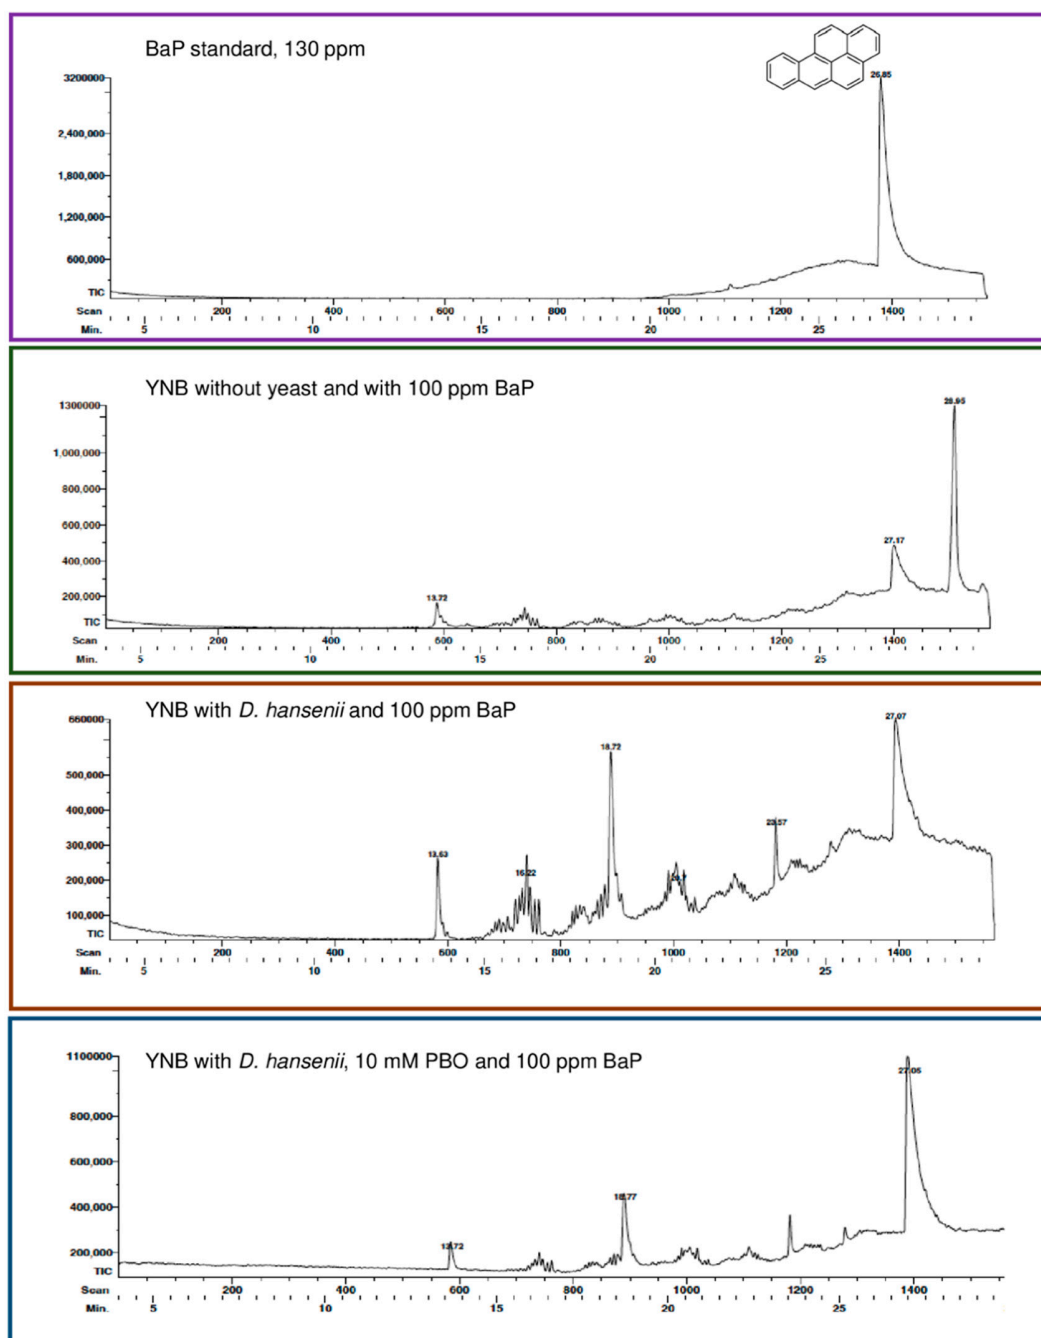

**Figure S2. GC chromatograms for BaP degradation by *D. hansenii*.** Chromatogram one was registered after analyzing a BaP standard (130 ppm, 500  $\mu$ M). Chromatogram two: BaP extracted in a cell-free YNB culture medium containing BaP 100 ppm (396  $\mu$ M) after 10 days. Chromatograms three and four: yeasts were grown for 24 h in YNBG medium and then transferred to a YNB supplemented containing 100 ppm BaP in the absence or presence of 10 mM PBO (CYP inhibitor), as indicated; after 10 days the non-metabolized BaP was extracted and analyzed. Representative chromatograms of the respective conditions are shown.

**Supplementary Figure S3.**

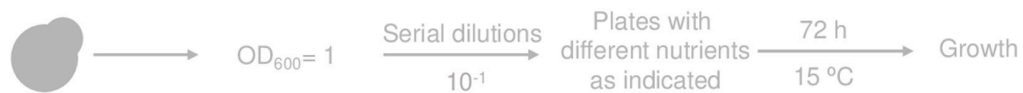

***S. cerevisiae* BY4742 pYES2-DhDIT2**

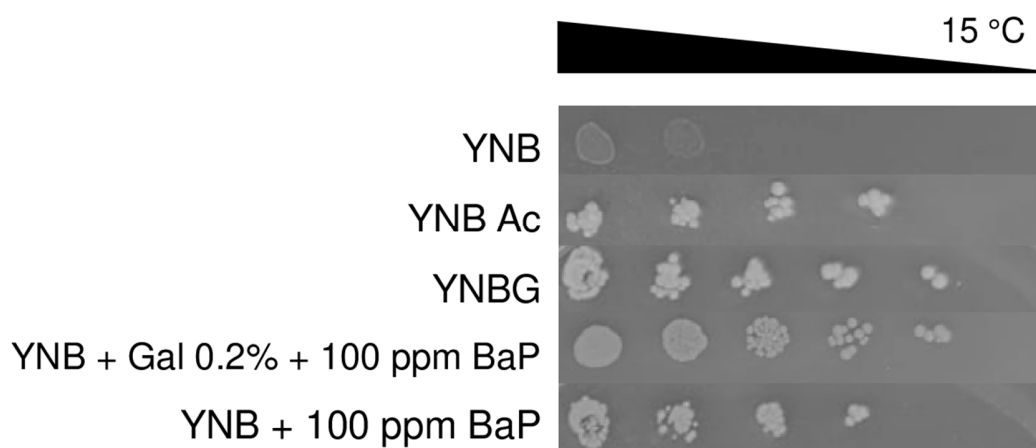

**Figure S3. Effect of BaP on the growth of *S. cerevisiae* BY4742 pYES2-DhDIT2.** Yeasts were grown overnight in a liquid YNBG medium and adjusted to  $OD_{600} = 1.0$ . Aliquots of 10-fold serial dilutions were spotted in the respective media and they were incubated at 15 °C for 72 h and photographed. A representative image of three independent experiments is shown.
